# Supplementary material for: Myelin-specific regulatory T cells accumulate in the CNS but fail to control autoimmune inflammation
Source: Springer Nature journal article supplement (doi:10.1038/nm1564), 2007-03-25
Supplement: 41591_2007_BFnm1564_MOESM48_ESM.pdf [file 41591_2007_BFnm1564_MOESM48_ESM.pdf]

## Supplementary Figure 1

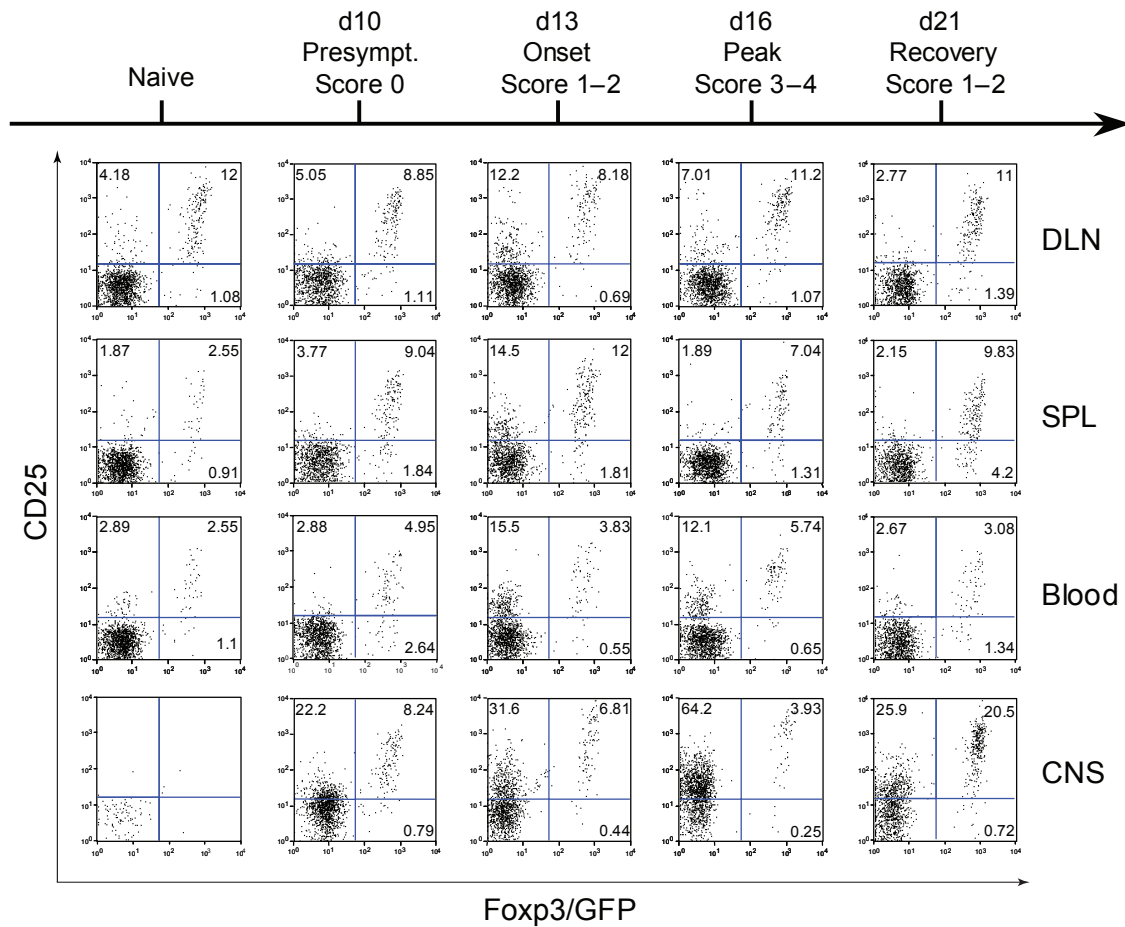

**Supplementary Figure 1.** T-reg population dynamics during EAE. Mononuclear cells were prepared from different compartments during EAE as indicated. Cells were stained for CD4 and CD25 and analyzed by flow cytometry. The panel illustrates the CD4<sup>+</sup> T-cell population relating the expression of Foxp3/GFP with the expression of CD25. Numbers indicate percentages.
