# Supplementary material for: Myelin-specific regulatory T cells accumulate in the CNS but fail to control autoimmune inflammation
Source: Springer Nature journal article supplement (doi:10.1038/nm1564), 2007-03-25
Supplement: 41591_2007_BFnm1564_MOESM49_ESM.pdf [file 41591_2007_BFnm1564_MOESM49_ESM.pdf]

Supplementary Figure 2

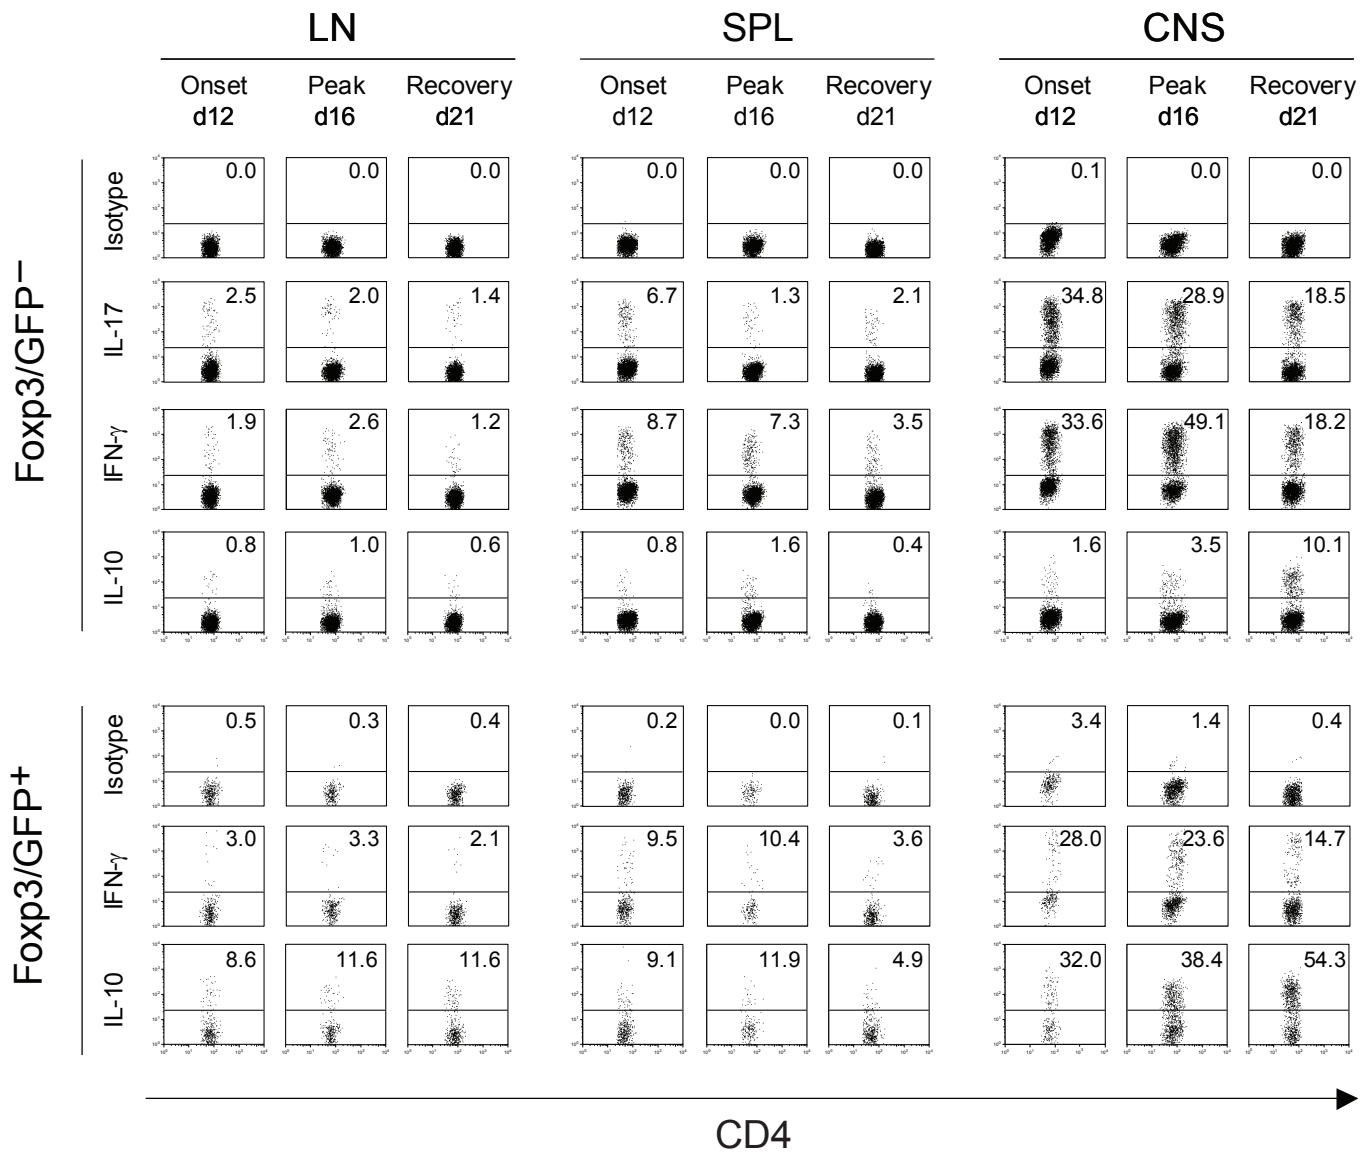

**Supplementary Figure 2.** Mononuclear cells were isolated from lymph nodes (LN), spleen (SPL), and CNS at different stages of EAE followed by *ex vivo*-stimulation with PMA/ionomycin and intracellular cytokine staining. Cytograms represent the profile of the indicated cytokines in T-eff (CD4<sup>+</sup>Foxp3/GFP<sup>-</sup>) and T-reg (CD4<sup>+</sup>Foxp3/GFP<sup>+</sup>) during EAE. Numbers indicate percentages.
