# Supplementary material for: Myelin-specific regulatory T cells accumulate in the CNS but fail to control autoimmune inflammation
Source: Springer Nature journal article supplement (doi:10.1038/nm1564), 2007-03-25
Supplement: 41591_2007_BFnm1564_MOESM50_ESM.pdf [file 41591_2007_BFnm1564_MOESM50_ESM.pdf]

## Supplementary Figure 3

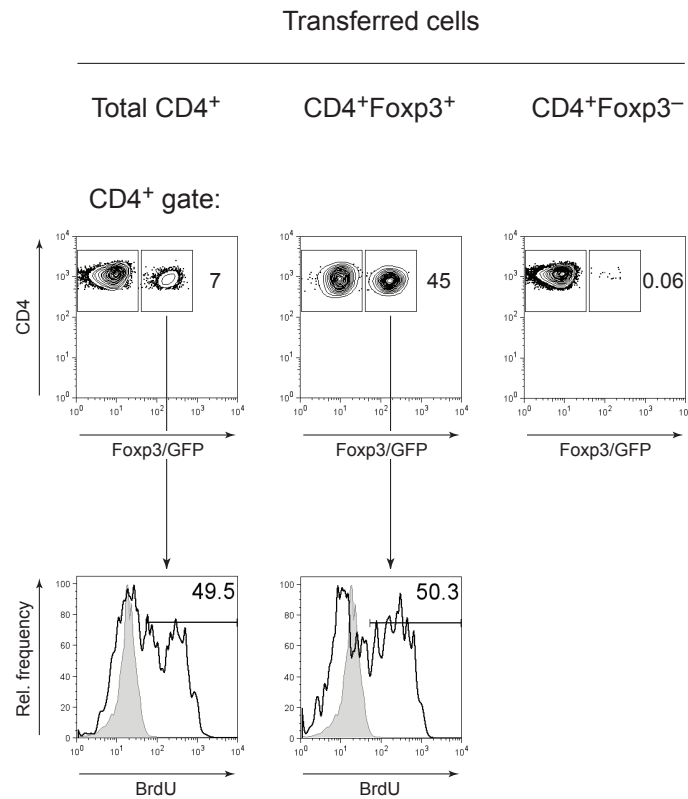

**Supplementary Figure 3.** Natural Foxp3<sup>+</sup> T-reg proliferate *in vivo*. *Rag2*<sup>-/-</sup> mice received 10x10<sup>6</sup> CD4<sup>+</sup> T-cells (containing a fraction of 8% Foxp3<sup>+</sup> cells), 1.5x10<sup>6</sup> FACS-sorted CD4<sup>+</sup>Foxp3<sup>+</sup> T-cells, or 5x10<sup>6</sup> FACS-sorted CD4<sup>+</sup>Foxp3<sup>-</sup> T-cells. After five days, the hosts were immunized with MOG<sub>35-55</sub>/CFA followed by BrdU treatment. On d16 after immunization, the spleens were analyzed for Foxp3/GFP expression and BrdU incorporation. The percentage fractions in the corresponding gates are indicated. The histograms illustrate the BrdU incorporation within the CD4<sup>+</sup> Foxp3/GFP<sup>+</sup> gate. The shaded curves represent the CD4<sup>+</sup>Foxp3/GFP<sup>+</sup> T-cell population recovered from a host that was not treated with BrdU (negative control).
