# Supplementary material for: Myelin-specific regulatory T cells accumulate in the CNS but fail to control autoimmune inflammation
Source: Springer Nature journal article supplement (doi:10.1038/nm1564), 2007-03-25
Supplement: 41591_2007_BFnm1564_MOESM51_ESM.pdf [file 41591_2007_BFnm1564_MOESM51_ESM.pdf]

# Supplementary Figure 4

**a**

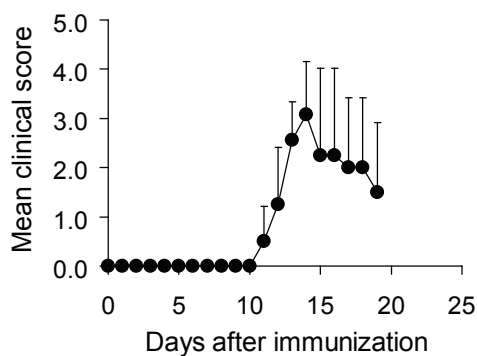

**b**

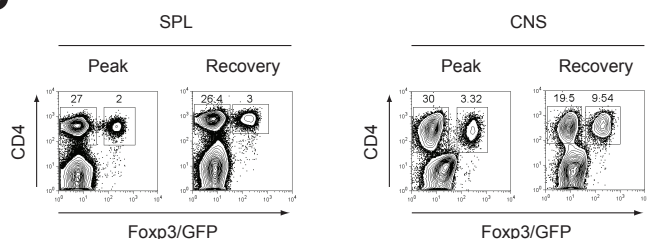

**e**

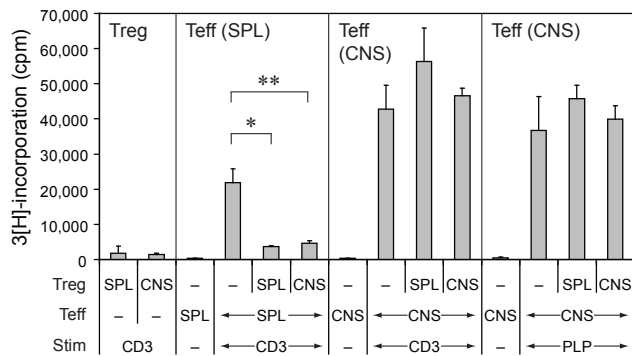

**c**

T-eff (CD4<sup>+</sup>Fopx3/GFP<sup>-</sup>) cytokines:

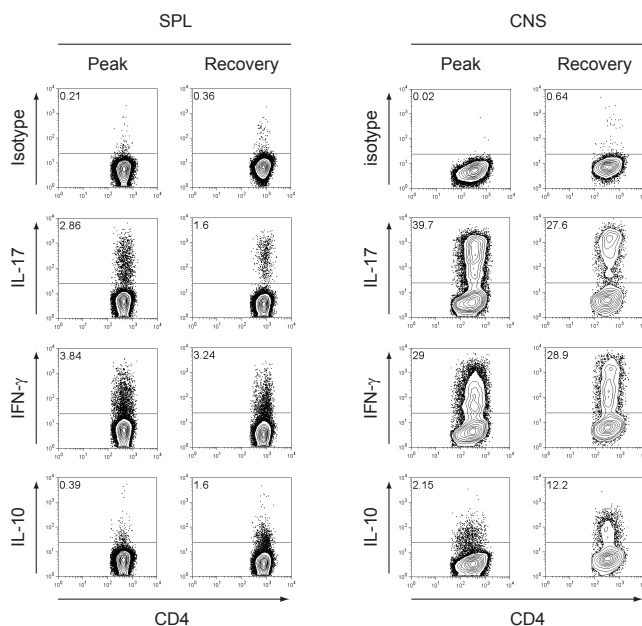

**d**

T-reg (CD4<sup>+</sup>Fopx3/GFP<sup>+</sup>) cytokines:

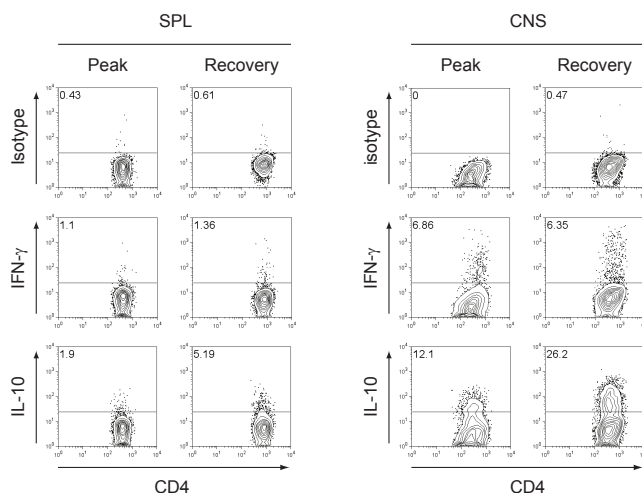

**Supplementary Figure 4.** T-eff and T-reg dynamics and function during the first disease episode in PLP<sub>139-151</sub> induced EAE. **(a)** SJL mice were crossed with *Foxp3gfp.KI*-mice and back-crossed onto the SJL genetic background for at least four generations (SJL *Foxp3gfp.KI*). In these mice, the expression of Foxp3 was linked to the expression of GFP as described for the original *Foxp3gfp.KI*-mice. EAE was induced by immunization with PLP<sub>139-151</sub>/CFA and the disease course was followed for 20 days ( $n=9$ , +SD). **(b)** Splenocytes and CNS mononuclear cells were isolated from female SJL *Foxp3gfp.KI*-mice at the peak of disease (d14) and during recovery (d19) and stained for CD4. The percentages of CD4<sup>+</sup>Fopx3/GFP<sup>-</sup> T-cells (T-eff) and CD4<sup>+</sup>Fopx3/GFP<sup>+</sup> T-cells (T-reg) within the mononuclear cell populations of the spleen and the CNS are shown. **(c, d)** Mononuclear cells were prepared from SJL *Foxp3gfp.KI*-mice at the peak of disease and during recovery, stimulated *ex vivo* with PMA/ionomycin and stained for CD4 and intracellular cytokines. **(c)** Cytokine expression (percentages) in the T-eff gate (CD4<sup>+</sup>Fopx3/GFP<sup>-</sup>). **(d)** Cytokine expression (percentages) in the T-reg gate (CD4<sup>+</sup>Fopx3/GFP<sup>+</sup>). **(e)** T-eff (CD4<sup>+</sup>Fopx3/GFP<sup>-</sup>) and T-reg (CD4<sup>+</sup>Fopx3/GFP<sup>+</sup>) were isolated by FACS-sorting from the spleen and the CNS of SJL *Foxp3gfp.KI*-mice at the peak of disease (d14). Splenic T-eff and CNS-T-eff were compared for their susceptibility to suppression by spleen-derived or CNS-derived T-reg in anti-CD3-driven and PLP<sub>139-151</sub>-specific proliferation assays. Mean 3[H]-thymidine-incorporation of triplicate cultures (+SD). \* $P<5 \times 10^{-5}$ , \*\* $P<3 \times 10^{-5}$ , t-test.
